# Supplementary material
Source: HighWire-hosted journal article supplement (http://www.jneurosci.org/highwire/filestream/599689/field_highwire_adjunct_files/4/Supplemental_Legend.pdf)
Supplement: Supplemental_Legend.pdf [file Supplemental_Legend.pdf]

**Supplemental Figure 1: Comparison of KA and Glu responses as well as NASP (naphthyl acetyl spermine) block of GluR1(Q)flip and resGluR1(Q)flip. Data are given  $\pm$  S.E.M. Upper traces: Representative kainate-evoked currents of *Xenopus* oocytes injected with 8 ng GluR1(Q)i (= GluR1(Q)flip, left) or GluR1(Q)i-si cRNA (= resGluR1(Q)flip, right). Recordings were done 4-7 days after injection at a holding potential of -70 mV in normal frog Ringer (NFR). Agonist (150  $\mu$ M) was applied for 20 sec. Lower traces: *I-V* relationships of GluR1(Q)i (left) and GluR1(Q)i-si (right) measured at membrane potentials between -150 mV and +50 mV with kainate as the agonist.**

**Supplemental Figure 2 Characterization of HB9-Cre x ROSA26 mice.**

**Representative images of X-gal stained tissue sections (P23) from HB9-Cre x ROSA26 mice. There were no stained cells in the motor cortex or basal ganglia (panel A, calibration bar = 700  $\mu$ m) but a small cluster of blue cells were found in the medullary tegmentum (panel B and C, calibration bars = 600 and 300  $\mu$ m, respectively). Stained cells were found in the cervical (panel D), thoracic (panel E) and lumbar spinal cord (panel F, calibration bar = 200  $\mu$ m). The chart below displays the number of animals with stained cells in the spinal cord at the cervical, thoracic and lumbar levels. Two ages were examined (P23 and 3 months) and there were a total of 8 animals in each**

group. Motor neurons are tabulated separately from interneurons.

**Supplemental Figure 3: Comparison of dendrites from mice genetically altered at a single locus. The dendrite morphology of spinal motor neurons from *GluR1*<sup>+/+</sup>, Hb9-Cre and *GluR1*<sup>LoxP/LoxP</sup> mice at P23. There are no statistically significant changes of dendrite morphology of spinal motor neurons among these three group mice.**

**Supplemental Figure 4 Comparison of motor behavior of mice genetically altered at a single locus (P23). Locomotor performance on 3 tasks was evaluated in *GluR1*<sup>+/+</sup> (n=10), Hb9-CRE (n=16) and *GluR1*<sup>LoxP/LoxP</sup> mice (n=11). There are no statistically significant differences in motor behavior among these three group mice.**
